# Supplementary material
Source: PubMed Central journal article supplement (PMC5642719)
Supplement: pnas.1711267114.sd01.pdf [file pnas.1711267114.sd01.pdf]

**Statistical analysis for electrophysiology:**

Statistical analysis was performed using Graphpad Prism. A probability value of  $p < 0.05$  was considered statistically significant (\* $P < 0.05$ ; \*\* $P < 0.01$ ; \*\*\* $P < 0.001$ ; \*\*\*\* $P < 0.0001$ ).

**Statistical Analysis (P values) for Fig. 1:**

**\* NA : Not Applicable**

|                | Time, min |        |          |        |          |        |          |        |          |        |
|----------------|-----------|--------|----------|--------|----------|--------|----------|--------|----------|--------|
|                | 30        |        | 75       |        | 120      |        | 180      |        | 240      |        |
|                | Wilcoxon  | U test | Wilcoxon | U test | Wilcoxon | U test | Wilcoxon | U test | Wilcoxon | U test |
| <b>Fig. 1B</b> |           |        |          |        |          |        |          |        |          |        |
| SC-CA2         | 0.043     | NA     | NA       | NA     | 0.043    | NA     | 0.043    | NA     | NA       | NA     |
| SC-CA1         | 0.043     | NA     | NA       | NA     | 0.345    | 0.012  | 0.138    | 0.012  | NA       | NA     |
| MF-CA3         | 0.501     | NA     | NA       | NA     | 0.500    | 0.012  | 0.500    | 0.012  | NA       | NA     |
| <b>Fig. 1D</b> |           |        |          |        |          |        |          |        |          |        |
| SC             | 0.109     | NA     | NA       | NA     | 0.007    | NA     | NA       | NA     | 0.007    | NA     |
| EC             | 0.007     | NA     | NA       | NA     | 0.010    | NA     | NA       | NA     | 0.010    | NA     |

|  | Time, min |        |          |        |
|--|-----------|--------|----------|--------|
|  | 20        |        | 50       |        |
|  | Wilcoxon  | U test | Wilcoxon | U test |

**Fig. 1E.**

|    |       |    |       |    |
|----|-------|----|-------|----|
| SC | 0.005 | NA | 0.005 | NA |
|----|-------|----|-------|----|

**Fig. 1F.**

|          |       |    |       |    |
|----------|-------|----|-------|----|
| CA2-ctrl | 0.753 | NA | 0.753 | NA |
|----------|-------|----|-------|----|

## Statistical Analysis (P values) for Fig. 2:

|                 | Time, min |        |          |        |          |        |          |        |          |        |
|-----------------|-----------|--------|----------|--------|----------|--------|----------|--------|----------|--------|
|                 | 30        |        | 75       |        | 120      |        | 180      |        | 240      |        |
|                 | Wilcoxon  | U test | Wilcoxon | U test | Wilcoxon | U test | Wilcoxon | U test | Wilcoxon | U test |
| <b>Fig. 2A.</b> |           |        |          |        |          |        |          |        |          |        |
| SC              | 0.011     | NA     | NA       | NA     | 0.011    | 0.001  | NA       | NA     | 0.011    | 0.001  |
| EC              | NA        | NA     | 0.326    | NA     | 0.779    | 0.001  | NA       | NA     | 0.401    | 0.001  |
| <b>Fig. 2B.</b> |           |        |          |        |          |        |          |        |          |        |
| SC              | NA        | NA     | 0.612    | NA     | 0.398    | 0.002  | NA       | NA     | 0.865    | 0.002  |
| EC              | 0.017     | NA     | NA       | NA     | 0.018    | 0.002  | NA       | NA     | 0.017    | 0.002  |
| <b>Fig. 2C.</b> |           |        |          |        |          |        |          |        |          |        |
| SC              | NA        | NA     | 0.345    | NA     | 0.753    | NA     | NA       | NA     | 0.172    | NA     |
| EC              | NA        | NA     | 0.345    | NA     | 0.074    | NA     | NA       | NA     | 0.172    | NA     |
| <b>Fig. 2D.</b> |           |        |          |        |          |        |          |        |          |        |
| SC              | 0.753     | NA     | NA       | NA     | 0.753    | NA     | NA       | NA     | 0.753    | NA     |
| EC              | 0.753     | NA     | NA       | NA     | 0.753    | NA     | NA       | NA     | 0.345    | NA     |

### Statistical Analysis (P values) for Fig. 3:

|                 |       | Time, min |        |          |        |          |        |          |        |          |        |
|-----------------|-------|-----------|--------|----------|--------|----------|--------|----------|--------|----------|--------|
|                 |       | 30        |        | 75       |        | 120      |        | 180      |        | 240      |        |
|                 |       | Wilcoxon  | U test | Wilcoxon | U test | Wilcoxon | U test | Wilcoxon | U test | Wilcoxon | U test |
| <b>Fig. 3A.</b> |       |           |        |          |        |          |        |          |        |          |        |
| SC              | NA    | NA        | NA     | NA       | NA     | NA       | NA     | NA       | NA     | NA       | NA     |
| EC              | NA    | NA        | 0.398  | NA       | 0.017  | NA       | NA     | NA       | NA     | 0.128    | NA     |
| <b>Fig. 3B.</b> |       |           |        |          |        |          |        |          |        |          |        |
| SC              | 0.111 | NA        | NA     | NA       | 0.017  | NA       | NA     | NA       | NA     | 0.017    | NA     |
| EC              | NA    | NA        | 0.090  | NA       | 0.017  | NA       | NA     | NA       | NA     | 0.013    | NA     |
| <b>Fig. 3C.</b> |       |           |        |          |        |          |        |          |        |          |        |
| SC              | NA    | NA        | NA     | NA       | NA     | NA       | NA     | NA       | NA     | NA       | NA     |
| EC              | NA    | NA        | 0.735  | NA       | 0.017  | NA       | NA     | NA       | NA     | 0.236    | NA     |
| <b>Fig. 3D.</b> |       |           |        |          |        |          |        |          |        |          |        |
| SC              | 0.017 | NA        | NA     | NA       | 0.011  | NA       | NA     | NA       | NA     | 0.011    | NA     |
| EC              | NA    | NA        | 0.400  | NA       | 0.011  | NA       | NA     | NA       | NA     | 0.011    | NA     |
| <b>Fig. 3E.</b> |       |           |        |          |        |          |        |          |        |          |        |
| SC              | NA    | NA        | NA     | NA       | NA     | NA       | NA     | NA       | NA     | NA       | NA     |
| EC              | NA    | NA        | 0.865  | NA       | 0.017  | NA       | NA     | NA       | NA     | 0.398    | NA     |
| <b>Fig. 3F.</b> |       |           |        |          |        |          |        |          |        |          |        |
| SC              | 0.016 | NA        | NA     | NA       | 0.003  | NA       | NA     | NA       | NA     | 0.003    | NA     |
| EC              | NA    | NA        | 0.858  | NA       | 0.003  | NA       | NA     | NA       | NA     | 0.003    | NA     |

### Statistical Analysis (P values) for Fig. 4:

#### Fig. 4A.

|    |       |    |    |    |       |    |    |    |       |    |
|----|-------|----|----|----|-------|----|----|----|-------|----|
| SC | 0.310 | NA | NA | NA | 0.612 | NA | NA | NA | 0.398 | NA |
| EC | 0.062 | NA | NA | NA | 0.735 | NA | NA | NA | 0.865 | NA |

#### Fig. 4B.

|    |       |    |    |    |       |    |    |    |       |    |
|----|-------|----|----|----|-------|----|----|----|-------|----|
| SC | 0.027 | NA | NA | NA | 0.027 | NA | NA | NA | 0.027 | NA |
| EC | 0.115 | NA | NA | NA | 0.027 | NA | NA | NA | 0.027 | NA |

#### Fig. 4D.

|    |       |    |    |    |       |    |    |    |       |    |
|----|-------|----|----|----|-------|----|----|----|-------|----|
| SC | 0.612 | NA | NA | NA | 0.498 | NA | NA | NA | 0.311 | NA |
| EC | 0.311 | NA | NA | NA | 0.091 | NA | NA | NA | 0.236 | NA |

#### Fig. 4E.

|    |       |    |    |    |       |    |    |    |       |    |
|----|-------|----|----|----|-------|----|----|----|-------|----|
| SC | 0.865 | NA | NA | NA | 0.017 | NA | NA | NA | 0.017 | NA |
| EC | 0.735 | NA | NA | NA | 0.017 | NA | NA | NA | 0.017 | NA |

### Statistical Analysis (P values) for Fig. 5:

#### Fig. 5A.

|    |       |    |    |    |       |    |    |    |       |    |
|----|-------|----|----|----|-------|----|----|----|-------|----|
| SC | 0.046 | NA | NA | NA | 0.027 | NA | NA | NA | 0.017 | NA |
| EC | 0.046 | NA | NA | NA | 0.345 | NA | NA | NA | 0.027 | NA |

#### Fig. 5B.

|    |       |    |       |    |       |    |    |    |       |    |
|----|-------|----|-------|----|-------|----|----|----|-------|----|
| SC | 0.017 | NA | NA    | NA | 0.017 | NA | NA | NA | 0.017 | NA |
| EC | NA    | NA | 0.176 | NA | 0.017 | NA | NA | NA | 0.017 | NA |

#### Fig. 5C.

|    |       |    |       |    |       |    |    |    |       |    |
|----|-------|----|-------|----|-------|----|----|----|-------|----|
| SC | 0.027 | NA | NA    | NA | 0.027 | NA | NA | NA | 0.027 | NA |
| EC | NA    | NA | 0.916 | NA | 0.027 | NA | NA | NA | 0.027 | NA |

### Statistical Analysis for SF 2:

|  | Time, min |        |          |        |          |        |          |        |          |        |
|--|-----------|--------|----------|--------|----------|--------|----------|--------|----------|--------|
|  | 30        |        | 75       |        | 120      |        | 180      |        | 240      |        |
|  | Wilcoxon  | U test | Wilcoxon | U test | Wilcoxon | U test | Wilcoxon | U test | Wilcoxon | U test |

Fig. SF2B.

|        |       |    |    |    |       |    |       |    |    |    |
|--------|-------|----|----|----|-------|----|-------|----|----|----|
| SC     | 0.500 | NA | NA | NA | 0.224 | NA | 0.079 | NA | NA | NA |
| EC     | 0.500 | NA | NA | NA | 0.224 | NA | 0.224 | NA | NA | NA |
| CA1-SC | 0.892 | NA | NA | NA | 0.685 | NA | 0.345 | NA | NA | NA |

Fig. SF2C.

|        |       |    |    |    |       |       |       |       |    |    |
|--------|-------|----|----|----|-------|-------|-------|-------|----|----|
| SC     | 0.248 | NA | NA | NA | 0.027 | 0.005 | 0.046 | 0.020 | NA | NA |
| EC     | 0.345 | NA | NA | NA | 0.027 | 0.008 | 0.027 | 0.008 | NA | NA |
| CA1-SC | 0.345 | NA | NA | NA | 0.079 | NA    | 0.115 | NA    | NA | NA |

### Statistical Analysis for SF 3:

|  | Time, min |        |          |        |          |        |          |        |          |        |
|--|-----------|--------|----------|--------|----------|--------|----------|--------|----------|--------|
|  | 30        |        | 75       |        | 120      |        | 180      |        | 240      |        |
|  | Wilcoxon  | U test | Wilcoxon | U test | Wilcoxon | U test | Wilcoxon | U test | Wilcoxon | U test |

Fig. SF3A.

|    |       |    |    |    |       |    |       |    |    |    |
|----|-------|----|----|----|-------|----|-------|----|----|----|
| SC | 0.310 | NA | NA | NA | 1.00  | NA | 0.398 | NA | NA | NA |
| EC | 0.865 | NA | NA | NA | 0.735 | NA | 0.865 | NA | NA | NA |

Fig. SF3B.

|    |       |       |    |    |       |       |       |       |    |    |
|----|-------|-------|----|----|-------|-------|-------|-------|----|----|
| SC | 0.172 | 0.005 | NA | NA | 0.115 | 0.013 | 0.463 | 0.045 | NA | NA |
| EC | 0.027 | 0.005 | NA | NA | 0.046 | 0.013 | 0.046 | 0.045 | NA | NA |

Fig. SF3C.

|    |       |       |    |    |       |       |       |       |    |    |
|----|-------|-------|----|----|-------|-------|-------|-------|----|----|
| SC | 0.128 | 0.001 | NA | NA | 0.678 | 0.013 | 0.441 | 0.658 | NA | NA |
| EC | 0.005 | 0.001 | NA | NA | 0.202 | 0.013 | 0.959 | 0.658 | NA | NA |

## Statistical Analysis for SF 4:

|                   | Time, min |        |          |        |          |        |          |        |          |        |
|-------------------|-----------|--------|----------|--------|----------|--------|----------|--------|----------|--------|
|                   | 30        |        | 75       |        | 120      |        | 180      |        | 240      |        |
|                   | Wilcoxon  | U test | Wilcoxon | U test | Wilcoxon | U test | Wilcoxon | U test | Wilcoxon | U test |
| <b>Fig. SF4A.</b> |           |        |          |        |          |        |          |        |          |        |
| SC                | 0.345     | NA     | NA       | NA     | 0.074    | NA     | 0.916    | NA     | NA       | NA     |
| EC                | 0.685     | NA     | NA       | NA     | 0.345    | NA     | 0.600    | NA     | NA       | NA     |
| <b>Fig. SF4B.</b> |           |        |          |        |          |        |          |        |          |        |
| SC                | 0.753     | NA     | NA       | NA     | 0.115    | NA     | 0.115    | NA     | NA       | NA     |
| EC                | 0.248     | NA     | NA       | NA     | 0.600    | NA     | 0.463    | NA     | NA       | NA     |
| <b>Fig. SF4C.</b> |           |        |          |        |          |        |          |        |          |        |
| SC                | 0.753     | NA     | NA       | NA     | 0.685    | NA     | 0.463    | NA     | NA       | NA     |
| EC                | 0.172     | NA     | NA       | NA     | 0.463    | NA     | 0.248    | NA     | NA       | NA     |
| <b>Fig. SF4D.</b> |           |        |          |        |          |        |          |        |          |        |
| SC                | 1.000     | NA     | NA       | NA     | 1.000    | NA     | 0.090    | NA     | NA       | NA     |
| EC                | 0.248     | NA     | NA       | NA     | 0.345    | NA     | 0.753    | NA     | NA       | NA     |

## Statistical Analysis for SF 5:

|                   |       |    |       |    |       |       |    |    |       |       |
|-------------------|-------|----|-------|----|-------|-------|----|----|-------|-------|
| <b>Fig. SF5A.</b> |       |    |       |    |       |       |    |    |       |       |
| SC                | 0.011 | NA | NA    | NA | NA    | NA    | NA | NA | NA    | NA    |
| EC                | NA    | NA | 0.483 | NA | 0.011 | NA    | NA | NA | 0.011 | NA    |
| <b>Fig. SF5B.</b> |       |    |       |    |       |       |    |    |       |       |
| SC                | NA    | NA | 0.310 | NA | 0.612 | 0.004 | NA | NA | 0.865 | 0.701 |
| EC                | NA    | NA | 0.612 | NA | 0.017 | 0.004 | NA | NA | 0.236 | 0.701 |
| <b>Fig. SF5C.</b> |       |    |       |    |       |       |    |    |       |       |
| SC                | NA    | NA | 0.115 | NA | 0.463 | 0.020 | NA | NA | 0.600 | 0.005 |
| EC                | 0.172 | NA | NA    | NA | 0.027 | 0.020 | NA | NA | 0.027 | 0.005 |

### **Statistical analysis for Real Time PCR**

Statistical analysis was performed using Excel and GraphPad Prism 6 (La Jolla, CA, USA). A probability value of  $p < 0.05$  was considered statistically significant (Fig. 1Ab & SF5; \* $P < 0.05$ ; \*\* $P < 0.01$ ; \*\*\* $P < 0.001$ ; \*\*\*\* $P < 0.0001$ ).

### **Statistical analysis for SF1:**

| <b>Samples</b> | <b>NK1 (p-values)</b> |
|----------------|-----------------------|
| CA1 vs CA2     | 0.0002                |
| CA1 vs CA3     | 0.0001                |

### **Statistical analysis for SF6:**

|     | <b>Sample</b>     | <b>CAMK4</b> | <b>PRKCZ</b> |
|-----|-------------------|--------------|--------------|
| CA2 | Control           | 0.003        | 0.048        |
|     | Vs                |              |              |
|     | Treated           | 0.020        | 0.044        |
|     | Naïve rat Control |              |              |
| Vs  |                   |              |              |
|     | Treated           |              |              |

### **Statistical analysis for Western blotting:**

Statistical analysis was performed using Excel and GraphPad Prism 6 (La Jolla, CA, USA). A probability value of  $p < 0.05$  was considered statistically significant (Fig. 4C<sub>b</sub>, F<sub>b</sub> & SF6<sub>b</sub>; \* $P < 0.05$ ; \*\* $P < 0.01$ ; \*\*\* $P < 0.001$ ; \*\*\*\* $P < 0.0001$ ).

### **Statistical analysis for Fig.4C<sub>b</sub>:**

| Samples         | p-values |
|-----------------|----------|
| Ctrl vs treated | 0.012    |

### **Statistical analysis for Fig.4F<sub>b</sub>:**

| Samples         | p-values |
|-----------------|----------|
| Ctrl vs treated | 0.014    |

### **Statistical analysis for SF7:**

| Samples                | p-values |
|------------------------|----------|
| Ctrl vs antisense      | 0.002    |
| Antisense vs scrambled | 0.005    |
